# Supplementary material for: Molecular and Cellular Differences in Cardiac Repair of Male and Female Mice
Source: PubMed Central journal article supplement — J Am Heart Assoc. 2020 Apr 16;9(8):e015672. doi: 10.1161/JAHA.119.015672 (PMC7428548; doi:10.1161/jaha.119.015672), 2020-04-16

# **Supplemental Material**

**Figure S1. (A)** Gating strategy for flow cytometry. **(B-C)** Donuts pie chart showing the survival rates of both sexes in acute and chronic HF.

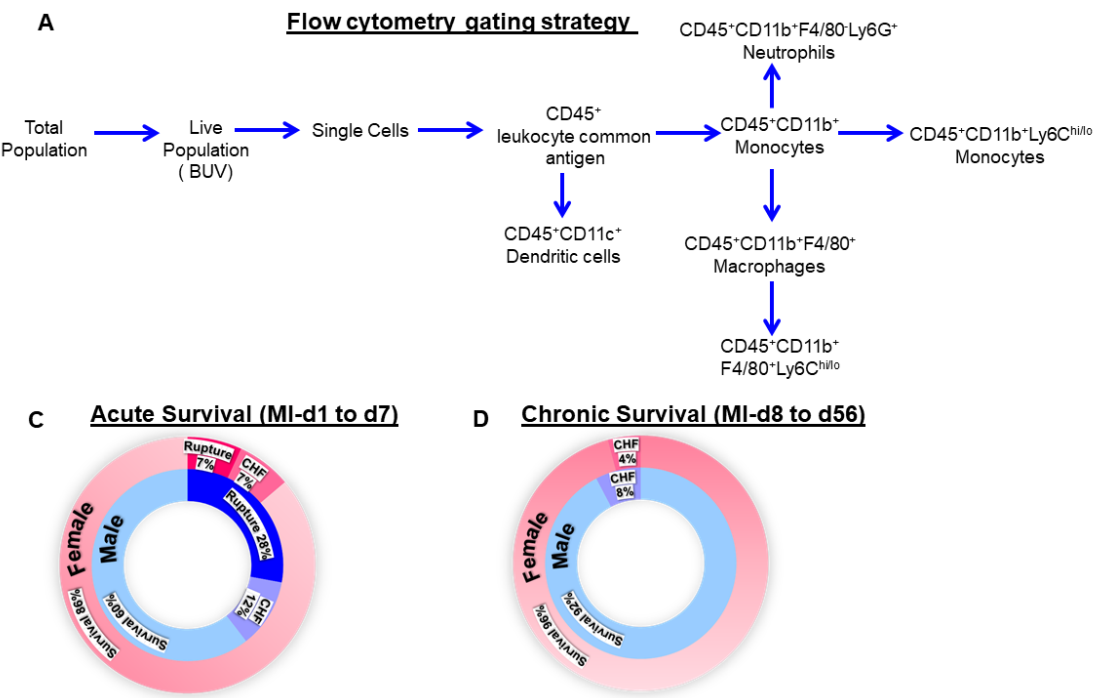

Figure S2. Heat map showing differential quantity of specialized pro-resolving mediators (SPMs) and epoxyeicosatrienoic acid (EETs) in male and female mice.

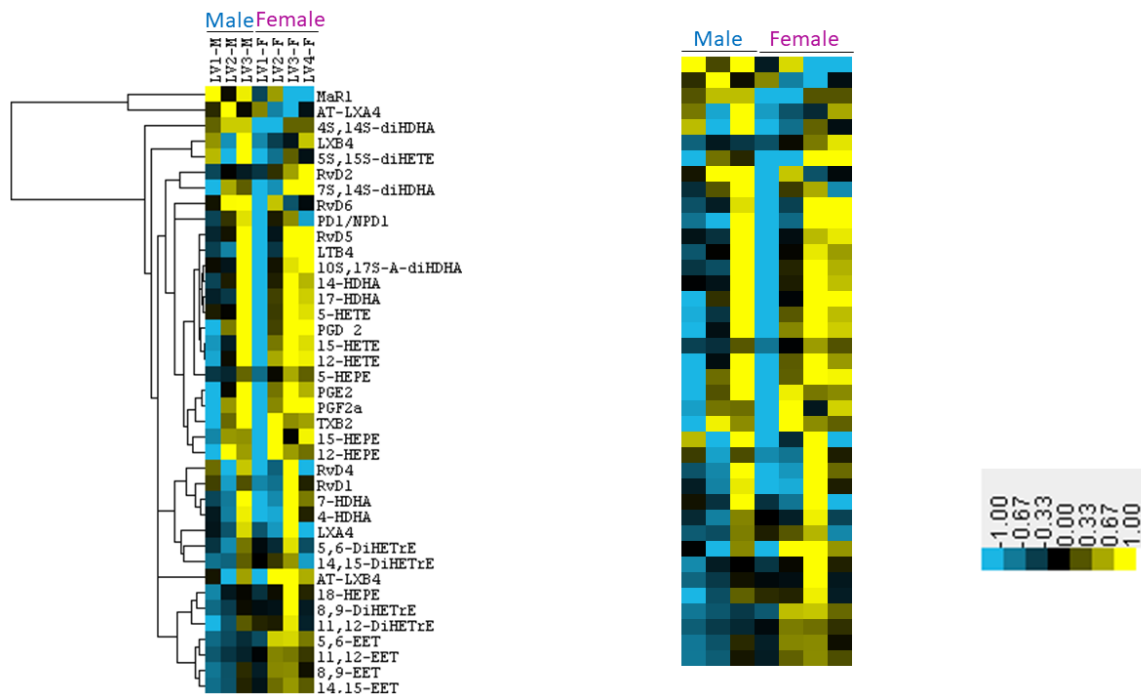

**Figure S3. Biosynthesis of arachidonic acid (AA)-derived proinflammatory mediators in male and female mice post-MI. (A) Pie chart showing the AA-derived proinflammatory mediators in the left ventricle of male mice at MI-d1. (B) Pie chart showing the AA-derived proinflammatory mediators in the left ventricle of female mice at MI-d1. (C) Bar graph showing AA-derived proinflammatory mediators of the left ventricle at MI-d1 of male and female mice. MI-d1: males (n=3), females (n=4).**

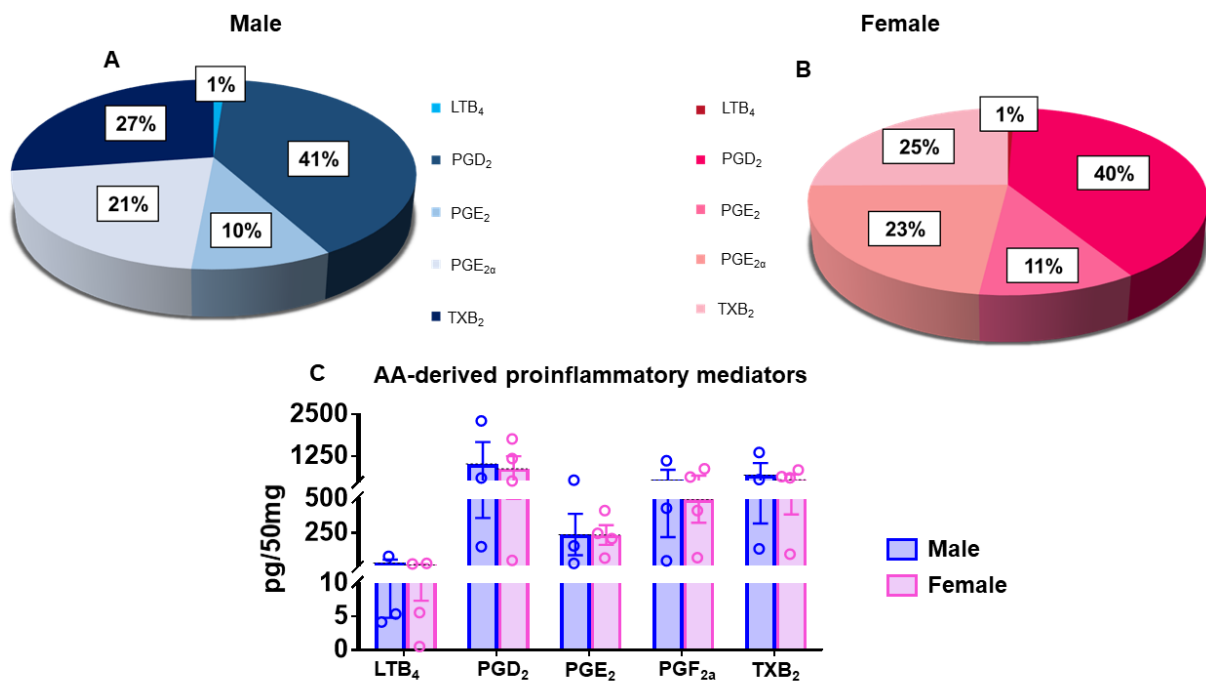

**Figure S4. Endogenous biosynthesis of docosahexaenoic acid (DHA) and eicosapentaenoic acid (EPA)-derived SPM precursors in male and female mice post-MI (A)** Pie chart showing the DHA and EPA precursors in the left ventricle of male mice at MI-d1. **(B)** Pie chart showing the DHA and EPA precursors in the left ventricle of female mice at MI-d1. **(C)** Bar graph showing DHA and EPA precursors of the left ventricle at MI-d1 of male and female mice. MI-d1: males (n=3), females (n=4).

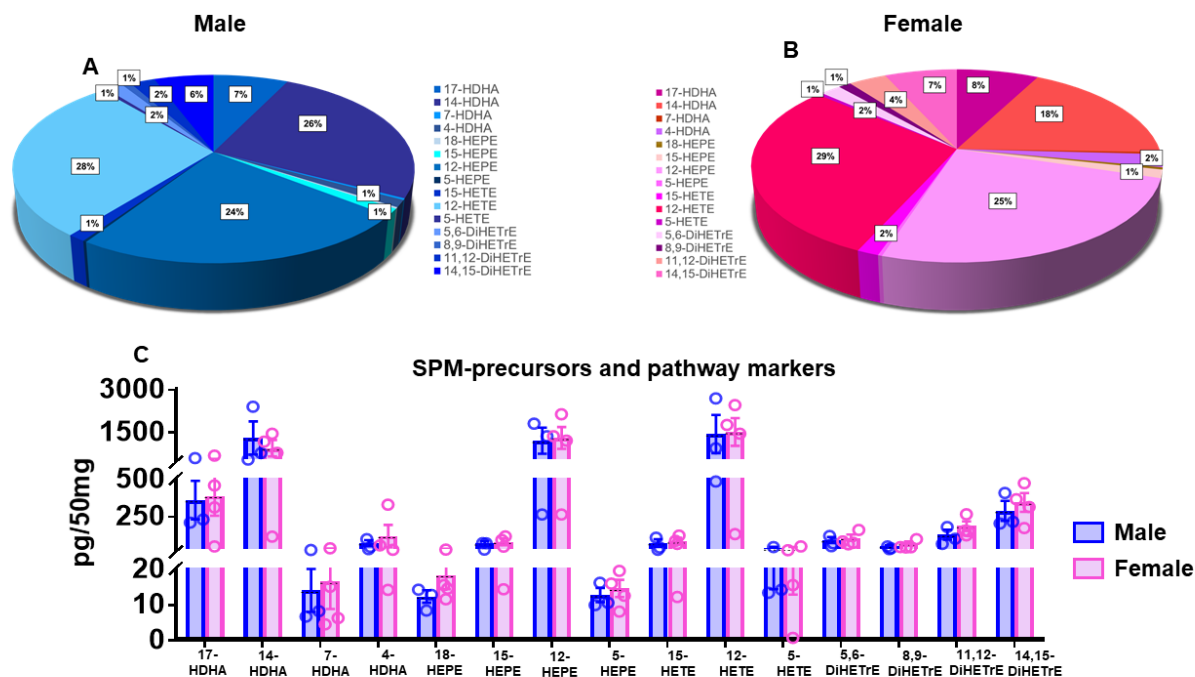

**Figure S5. Structural changes in cardiomyocyte area.** Wheat germ agglutinin (WGA) staining showing cardiomyocyte area in male and female mice. WGA = green, Hoechst = blue, [No-MI: males (n=4), females (n=4); MI-d1: males (n=5), females (n=6); MI-d56: males (n=4), females (n=4)].

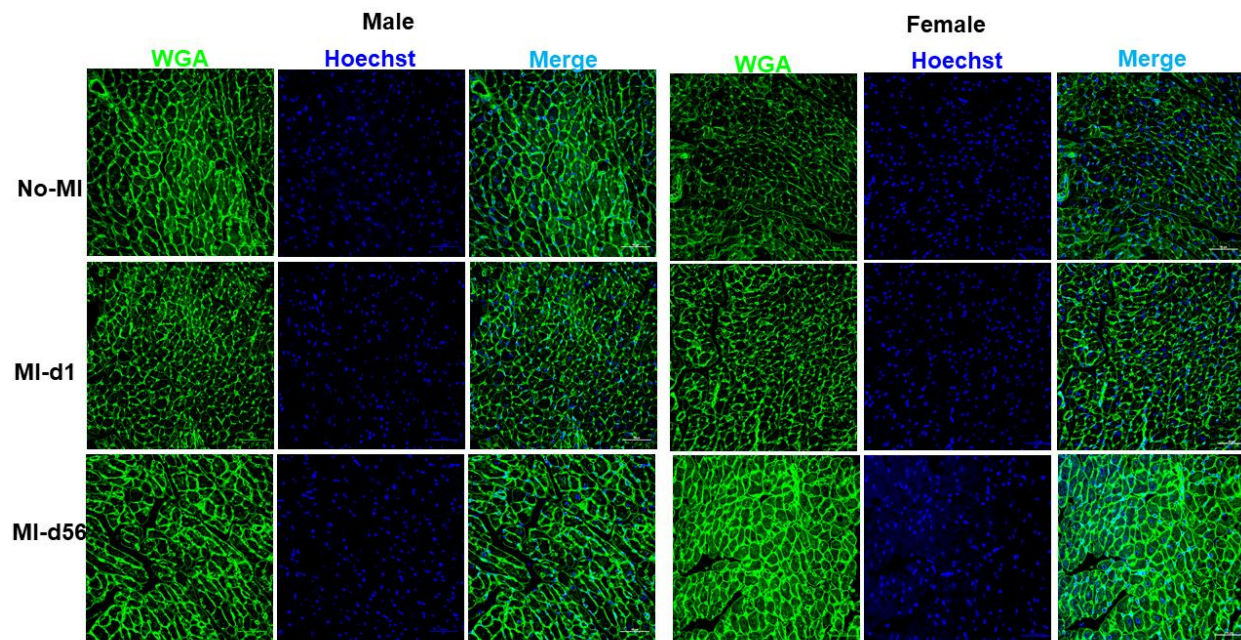

**Figure S6. Female mice have higher reparative macrophages (MΦ) compared to male mice post-MI. (A)** Plot showing macrophages at No-MI, MI-d1, MI-d3, MI-d5, and MI-d56 in male and female mice. **(B)** Plot showing Ly6C<sup>lo</sup> and Ly6C<sup>hi</sup> macrophages at No-MI, MI-d1, MI-d3, MI-d5, and MI-d56 in male and female mice. **(C-E)** Line graphs showing the percentage of the cell population for CD11b, Ly6C<sup>hi</sup>MΦ, and Ly6C<sup>lo</sup>MΦ. [No-MI: males (n=4), females (n=4); MI-d1: males (n=5), females (n=6); \$p<0.05 vs male at respective time point; \*p<0.05 compared to no-MI naïve controls.

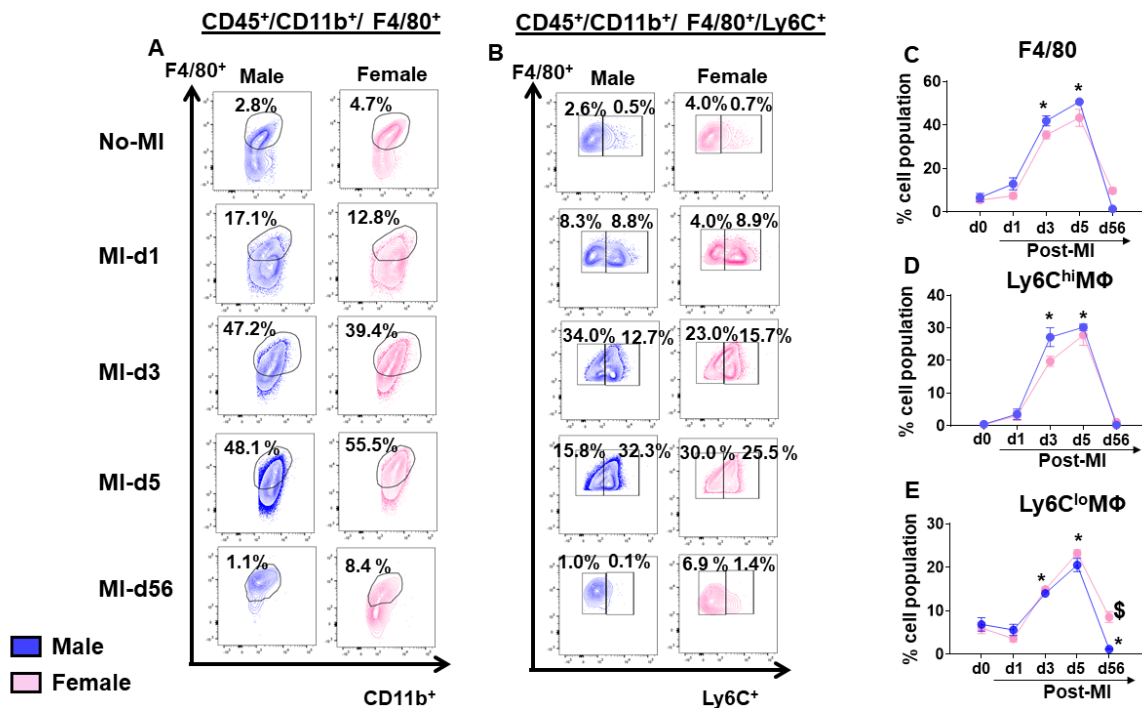

Supplement: JAH3-9-e015672-s001.pdf [file JAH3-9-e015672-s001.pdf]
